# Supplementary figures and images for: Synthesis and radiocarbon evidence of terephthalate polyesters completely prepared from renewable resources
Source: Royal Society of Chemistry journal article supplement (doi:10.1039/c1gc15400a), 2011-01-01

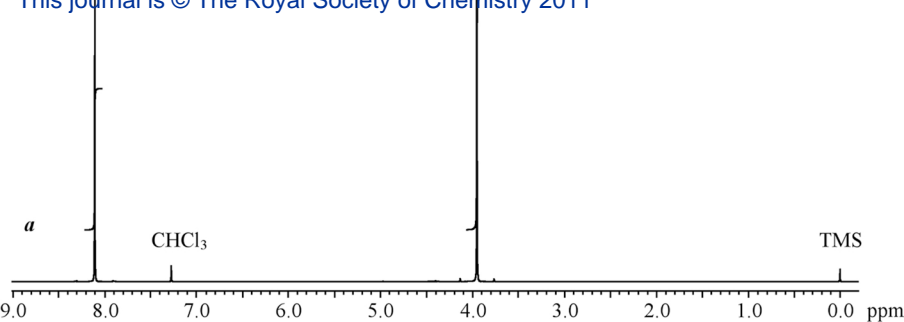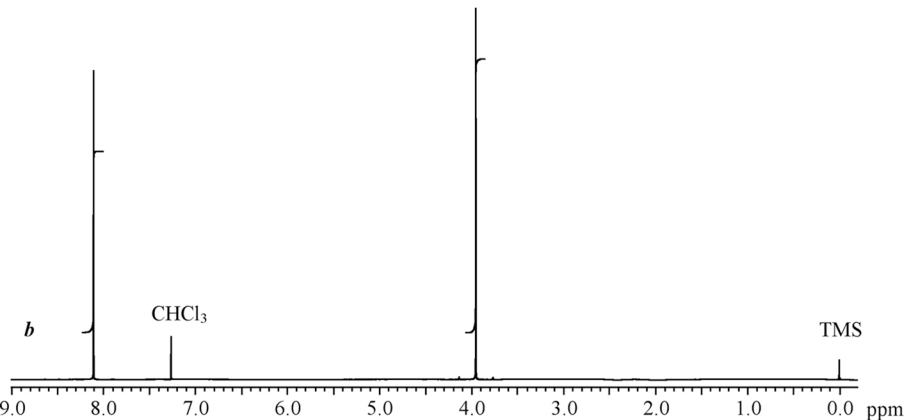

NMR spectra of DMT from limonene (a) and from non renewable resources (b)

Supplement: c1gc15400a.pdf [file c1gc15400a.pdf]
